# Supplementary material
Source: PubMed Central journal article supplement (PMC6875802)
Supplement: SMJ-60-565.pdf [file SMJ-60-565.pdf]

## SINGAPORE MEDICAL COUNCIL CATEGORY 3B CME PROGRAMME

(Code SMJ 201911A)

**Question 1.** Ebstein's anomaly is associated with:

- (a) Mitral valve prolapse.
- (b) Patent foramen ovale.
- (c) Aortic valve stenosis.
- (d) Pulmonary stenosis.

| True                     | False                    |
|--------------------------|--------------------------|
| <input type="checkbox"/> | <input type="checkbox"/> |

**Question 2.** The following ECG changes are associated with Ebstein's anomaly:

- (a) QRS fragmentation.
- (b) Left ventricular hypertrophy.
- (c) Right bundle branch block.
- (d) Right atrial enlargement.

|                          |                          |
|--------------------------|--------------------------|
| <input type="checkbox"/> | <input type="checkbox"/> |

**Question 3.** The following arrhythmias are associated with Ebstein's anomaly:

- (a) Brugada syndrome.
- (b) Wolff-Parkinson-White syndrome.
- (c) Atrial fibrillation.
- (d) Ventricular tachycardia.

|                          |                          |
|--------------------------|--------------------------|
| <input type="checkbox"/> | <input type="checkbox"/> |

**Question 4.** The following are considered indications for surgical intervention in Ebstein's anomaly:

- (a) Severe pulmonary hypertension.
- (b) Cyanosis.
- (c) Paradoxical embolism.
- (d) Congestive cardiac failure.

|                          |                          |
|--------------------------|--------------------------|
| <input type="checkbox"/> | <input type="checkbox"/> |

**Question 5.** Which of the following are expected physical examination findings in a patient with Ebstein's anomaly?

- (a) Pan-systolic murmur.
- (b) Widely split first heart sound.
- (c) Giant V wave.
- (d) Right ventricular heave.

|                          |                          |
|--------------------------|--------------------------|
| <input type="checkbox"/> | <input type="checkbox"/> |

### Doctor's particulars:

Name in full: \_\_\_\_\_ MCR no.: \_\_\_\_\_  
 Specialty: \_\_\_\_\_ Email: \_\_\_\_\_

#### SUBMISSION INSTRUCTIONS:

Visit the SMJ website: <http://www.smj.org.sg/current-issue> and select the appropriate quiz. You will be redirected to the SMA login page.

**For SMA member:** (1) Log in with your username and password (if you do not know your password, please click on 'Forgot your password?'). (2) Select your answers for each quiz and click 'Submit'.

**For non-SMA member:** (1) Create an SMJ CME account, or log in with your SMJ CME username and password (for returning users). (2) Make payment of SGD 21.40 (inclusive of 7% GST) via PayPal to access this month's quizzes. (3) Select your answers for each quiz and click 'Submit'.

#### RESULTS:

(1) Answers will be published online in the SMJ January 2020 issue. (2) The MCR numbers of successful candidates will be posted online at the SMJ website by 7 January 2020. (3) Passing mark is 60%. No mark will be deducted for incorrect answers. (4) The SMJ editorial office will submit the list of successful candidates to the Singapore Medical Council. (5) One CME point is awarded for successful candidates. (6) SMC credits CME points according to the month of publication of the CME article (i.e. points awarded for a quiz published in the December 2017 issue will be credited for the month of December 2017, even if the deadline is in January 2018).

**Deadline for submission: (November 2019 SMJ 3B CME programme): 12 noon, 31 December 2019.**
